# Supplementary material
Source: PubMed Central journal article supplement (PMC1876406)

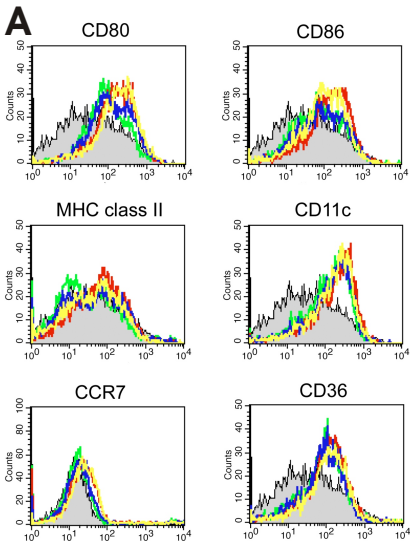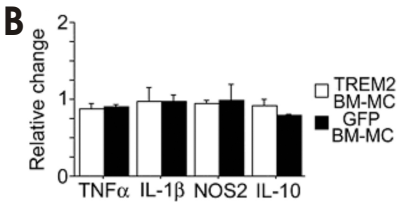

Supplement: pmed.0040124.sg001.pdf [file pmed.0040124.sg001.pdf]

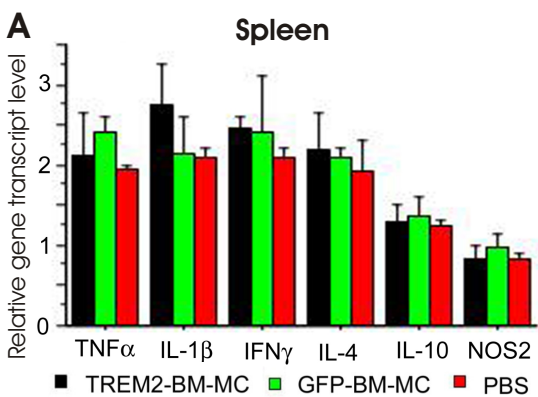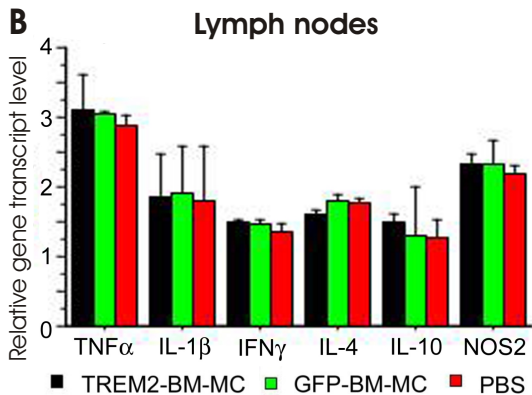

Supplement: pmed.0040124.sg002.pdf [file pmed.0040124.sg002.pdf]
